# Supplementary material for: Endomembrane targeting of human OAS1 p46 augments antiviral activity
Source: eLife. 2021 Aug 3;10:e71047. doi: 10.7554/eLife.71047 (PMC8357416; doi:10.7554/eLife.71047)
Supplement: Figure 6—source data 1. [file elife-71047-fig6-data1.xlsx]

## Sheet: HC vs severe covid-19
Hardy Weinberg equilibrium
CHR	SNP	TEST	A1	A2	GENO	O(HET)	E(HET)	P
12	rs10774671	ALL	G	A	17/58/58	0.4361	0.4525	0.7023
12	rs10774671	AFF	G	A	4/10/20	0.2941	0.3893	0.1841
12	rs10774671	UNAFF	G	A	13/48/38	0.4848	0.4681	0.8313
Allele frequency
CHR	SNP	A1	A2	MAF	NCHROBS
12	rs10774671	G	A	0.3459	266
Missingness
1 control subject with missing genotype
Association
Logistic regression dominant model ref allele G, adjusted for covariates
CHR	SNP	BP	A1	TEST	NMISS	OR	SE	L95	U95	STAT	P
12	rs10774671	112919388	G	DOM	131	0.3506	0.4402	0.1479	0.8308	-2.381	0.01727
12	rs10774671	112919388	G	Sex	131	1.217	0.4345	0.5193	2.852	0.4521	0.6512
12	rs10774671	112919388	G	RaceEthnic	131	1.28	0.133	0.9862	1.661	1.855	0.06355
